# Supplementary material for: Solvent-dependent zinc(ii) coordination polymers with mixed ligands: selective sorption and fluorescence sensing
Source: Royal Society of Chemistry journal article supplement (doi:10.1039/c5dt01386k), 2015-01-01
Supplement: c5dt01386k1.pdf [file c5dt01386k1.pdf]

*Electronic supplementary information (ESI)*

**Solvent-dependent zinc(II) coordination polymers with mixed ligands:  
selective sorption and fluorescence sensing**

**Ji-Ai Hua, Yue Zhao, Yan-Shang Kang, Yi Lu and Wei-Yin Sun\***

*Coordination Chemistry Institute, State Key Laboratory of Coordination Chemistry, School of Chemistry and Chemical Engineering, Nanjing National Laboratory of Microstructures, Collaborative Innovation Center of Advanced Microstructures, Nanjing University, Nanjing 210093, China. E-mail: [sunwy@nju.edu.cn](mailto:sunwy@nju.edu.cn); Fax: +86 25 83314502*

**Table S1** Hydrogen bonding data of **2**.

---

| Complex <b>2</b>        |                             |                               |                                       |                             |
|-------------------------|-----------------------------|-------------------------------|---------------------------------------|-----------------------------|
| <i>D</i> -H... <i>A</i> | <i>d</i> ( <i>D</i> -H) (Å) | <i>d</i> (H... <i>A</i> ) (Å) | <i>d</i> ( <i>D</i> ... <i>A</i> )(Å) | <i>D</i> -H... <i>A</i> (°) |
| O1W-H1WB...O13#1        | 0.85                        | 1.93                          | 2.637(6)                              | 140                         |
| O2W-H2WB...O14#1        | 0.85                        | 1.85                          | 2.557(6)                              | 139                         |
| O1W-H1WA...O12#2        | 0.85                        | 1.91                          | 2.702(5)                              | 155                         |
| C9-H9...O9#2            | 0.93                        | 2.40                          | 3.312(7)                              | 166                         |
| O3W-H3WA...O3#3         | 0.85                        | 2.03                          | 2.783(5)                              | 148                         |
| C18-H18...O1W#4         | 0.93                        | 2.58                          | 3.483(7)                              | 165                         |
| C27-H27...O11#5         | 0.93                        | 2.53                          | 3.448(7)                              | 169                         |
| C30-H30...O10#5         | 0.93                        | 2.44                          | 3.303(7)                              | 155                         |
| C28-H28...O8#6          | 0.93                        | 2.54                          | 3.166(7)                              | 125                         |
| C37-H37...O16'#7        | 0.93                        | 2.55                          | 3.334(13)                             | 143                         |

Symmetry codes: #1 2-x, -y, 2-z; #2 1+x, y, z; #3 -2+x, -1+y, z; #4 -1+x, y, z; #5 1-x, -y, 2-z; #6 1-x, -y, 1-z; #7 2-x, 1-y, 2-z.

---

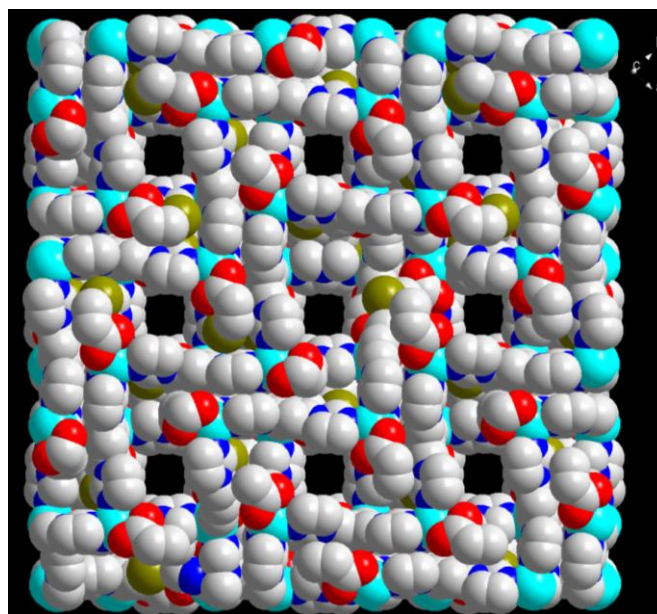

**Fig. S1** Space-filling view of the crystal structure of **1** along the *c* axis.

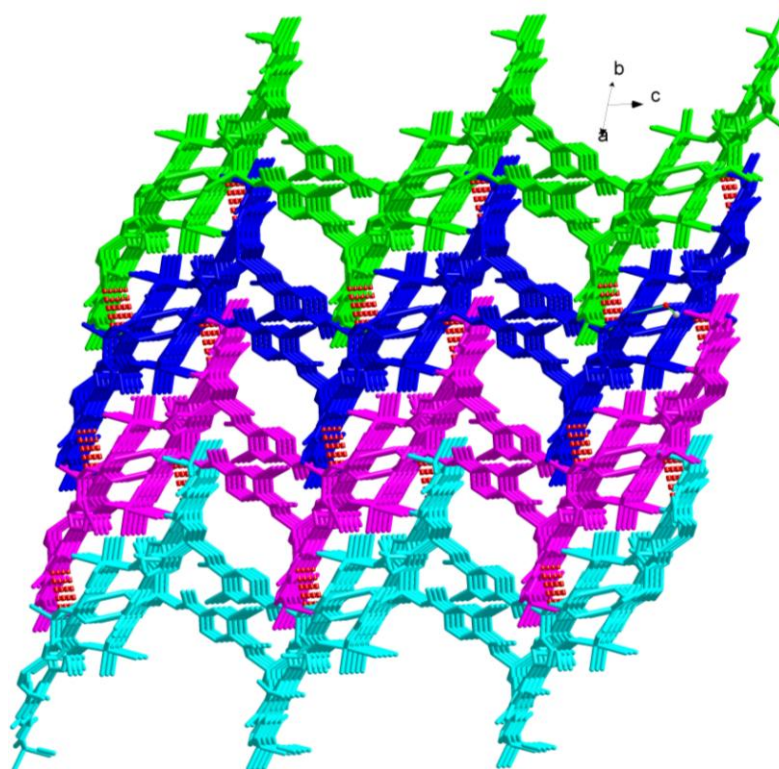

**Fig. S2** 3D supramolecular structure of **2** with 2D layers linked by hydrogen bonds: different color indicates the different layers. The hydrogen bonds are indicated by dashed lines.

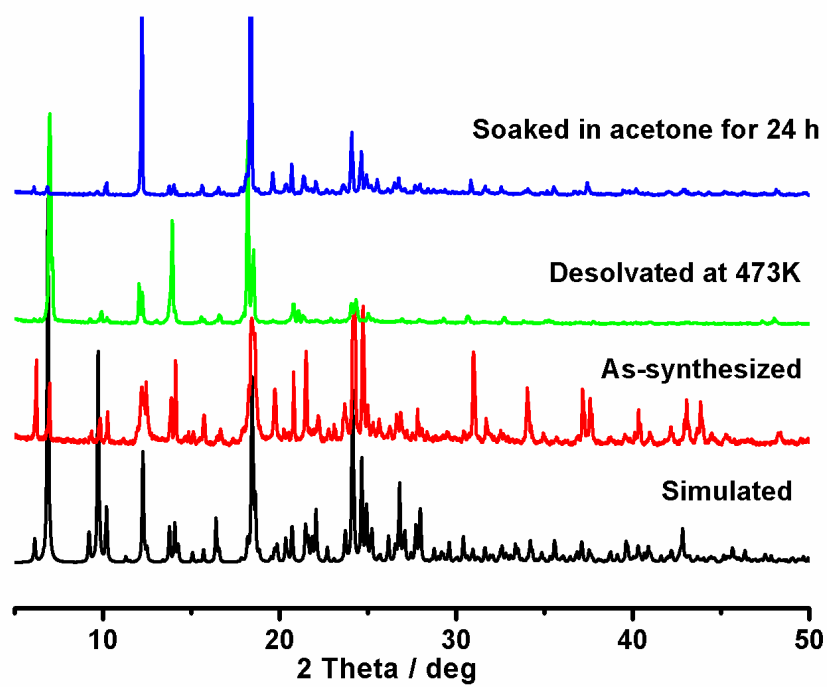

(a)

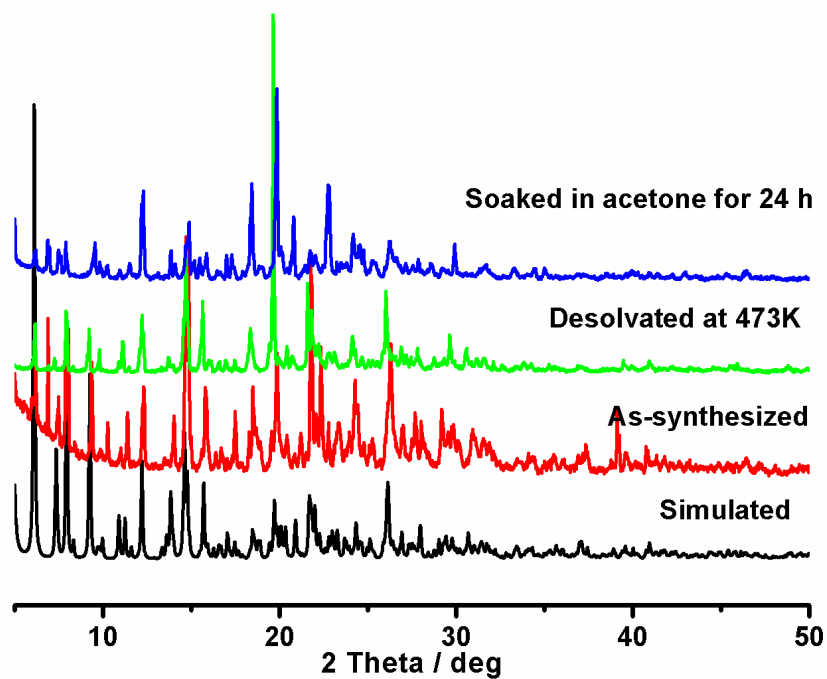

(b)

Fig. S3 PXRD patterns of **1** (a) and **2** (b).

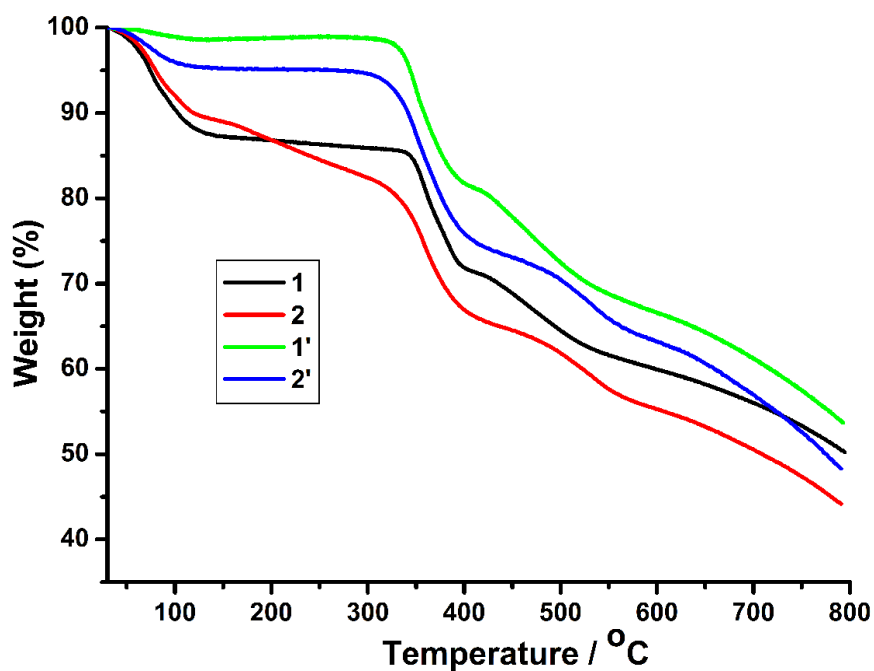

**Fig. S4** TGA curves of **1** and **2** and desolvated samples **1'** and **2'**.

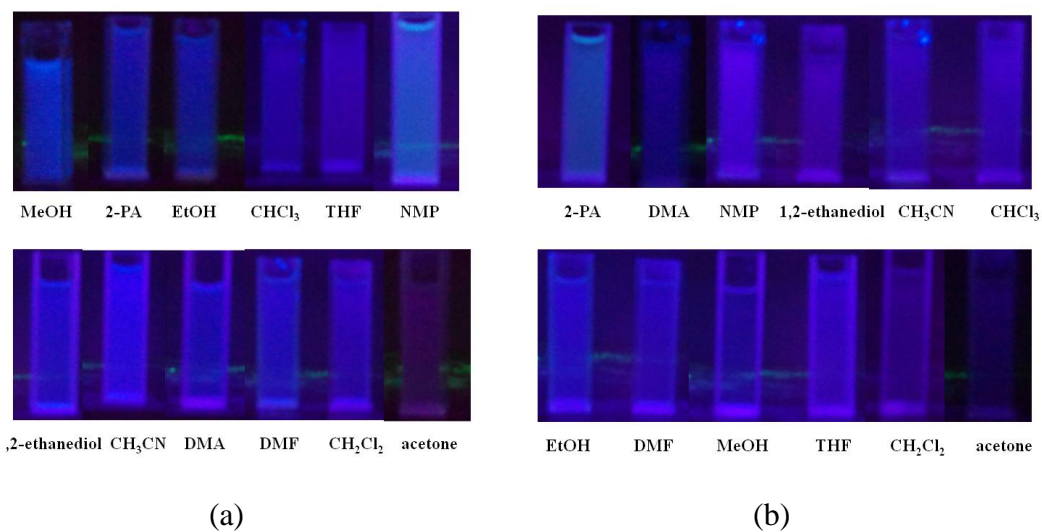

**Fig. S5** Photographs of the samples of **1** (a) and **2** (b) showing the fluorescence under ultraviolet light.
